# Supplementary material
Source: publisher figshare collection journal article supplement (https://sage.figshare.com/ndownloader/files/14569517)
Supplement: Supplementary file 1 [file 14569517]

## Sheet: Sheet1
Sample ID	geneName	category	radialSVM	phenolyzer	icagesGeneScore	I	II	III	IV	Lympho node metastasis	Distant metastasis
TCGA-A3-3308-01	BRCA2	Cancer Gene Census	0.988158	0.4978	0.924472	Yes	No	Yes	No	No	No
TCGA-A3-3308-01	FN1	KEGG Cancer Pathway	0.990412	0.3547	0.745105	Yes	No	Yes	No	No	No
TCGA-A3-3308-01	PTK2B	Other Category	0.952306	0.2938	0.561219	Yes	No	Yes	No	No	No
TCGA-A3-3311-01	BRCA2	Cancer Gene Census	0.717289	0.4978	0.730925	Yes	No	Yes	No	No	No
TCGA-A3-3317-01	NOTCH1	Cancer Gene Census	0.965523	0.3273	0.658754	No	Yes	No	Yes	No	Both
TCGA-A3-3319-01	SMARCA4	Cancer Gene Census	0.968915	0.3139	0.632122	Yes	No	Yes	Yes	No	Both
TCGA-A3-3320-01	PTK2	KEGG Cancer Pathway	0.865834	0.4533	0.798294	Yes	No	No	No	NA	No
TCGA-A3-3322-01	AKT3	KEGG Cancer Pathway	0.987672	0.4429	0.875208	Yes	No	No	No	NA	No
TCGA-A3-3322-01	ADCY8	Other Category	0.984727	0.3297	0.687554	Yes	Yes	No	Yes	Yes	Both
TCGA-A3-3322-01	MSH6	Cancer Gene Census	0.911591	0.3521	0.647568	Yes	No	Yes	No	No	No
TCGA-A3-3322-01	SMARCA4	Cancer Gene Census	0.957726	0.3139	0.617546	Yes	No	Yes	Yes	No	Both
TCGA-A3-3326-01	WT1	Cancer Gene Census	0.978345	0.301	0.613847	Yes	No	No	No	NA	No
TCGA-A3-3326-01	PML	Cancer Gene Census	0.799527	0.3901	0.591254	Yes	No	No	No	NA	No
TCGA-A3-3346-01	RARA	Cancer Gene Census	0.955061	0.3206	0.629942	Yes	No	No	No	NA	No
TCGA-A3-3346-01	TCF7	KEGG Cancer Pathway	0.990729	0.2634	0.538118	Yes	No	Yes	No	NA	No
TCGA-A3-3347-01	MTOR	KEGG Cancer Pathway	1.00191	0.431	0.870661	Yes	Yes	Yes	Yes	Both	Both
TCGA-A3-3357-01	PIK3CA	Cancer Gene Census	1.00498	0.6235	0.979511	Yes	Yes	Yes	Yes	No	Both
TCGA-A3-3357-01	NCOR1	Other Category	0.903925	0.3041	0.52029	No	Yes	Yes	No	No	No
TCGA-A3-3358-01	FN1	KEGG Cancer Pathway	0.908071	0.3547	0.649091	Yes	No	Yes	No	No	No
TCGA-A3-3362-01	COL4A6	KEGG Cancer Pathway	1.02482	0.2576	0.57045	Yes	No	Yes	No	No	No
TCGA-A3-3363-01	SRC	Other Category	1.00017	0.5187	0.941723	No	Yes	No	No	No	No
TCGA-A3-3363-01	VAV2	Other Category	1.01646	0.3067	0.675432	No	Yes	No	No	No	No
TCGA-A3-3365-01	BRCA2	Cancer Gene Census	0.720683	0.4978	0.734618	Yes	No	Yes	No	No	No
TCGA-A3-3376-01	PIK3R1	Cancer Gene Census	0.981638	0.5807	0.964612	Yes	No	No	Yes	No	Both
TCGA-A3-3376-01	SDHB	Cancer Gene Census	1.04158	0.225	0.51193	Yes	No	No	No	No	No
TCGA-A3-3378-01	EP300	Cancer Gene Census	0.99569	0.6339	0.980555	Yes	No	Yes	No	Both	No
TCGA-A3-3380-01	VHL	Cancer Gene Census	1.02602	0.3253	0.72587	Yes	Yes	Yes	Yes	Both	Both
TCGA-A3-3382-01	VHL	Cancer Gene Census	0.976971	0.3253	0.66845	Yes	Yes	Yes	Yes	Both	Both
TCGA-A3-3382-01	HSP90AB1	KEGG Cancer Pathway	0.906833	0.3356	0.602372	Yes	No	No	No	NA	No
TCGA-A3-3383-01	ITPR2	Other Category	1.01947	0.3184	0.704278	Yes	No	Yes	Yes	No	Both
TCGA-A3-3385-01	FGFR1	Cancer Gene Census	1.00518	0.4784	0.917092	Yes	No	No	Yes	No	Both
TCGA-A3-3385-01	MSH2	Cancer Gene Census	0.90916	0.3837	0.713788	Yes	No	No	No	No	No
TCGA-A3-3385-01	LAMA2	KEGG Cancer Pathway	1.00928	0.2617	0.559397	Yes	No	No	No	No	No
TCGA-A3-3387-01	CSF3R	Cancer Gene Census	0.96582	0.3297	0.664548	Yes	No	No	No	No	No
TCGA-AK-3425-01	HDAC1	KEGG Cancer Pathway	0.854636	0.5051	0.862516	Yes	No	No	No	No	No
TCGA-AK-3425-01	ITPR2	Other Category	0.972758	0.3184	0.64751	Yes	No	Yes	Yes	No	Both
TCGA-AK-3429-01	FLT3	Cancer Gene Census	1.02003	0.3421	0.752143	Yes	Yes	No	No	No	No
TCGA-AK-3431-01	NOTCH1	Cancer Gene Census	0.897613	0.3273	0.569626	No	Yes	No	Yes	No	Both
TCGA-AK-3434-01	ITGA6	KEGG Cancer Pathway	0.928509	0.3013	0.547251	Yes	No	Yes	No	No	No
TCGA-AK-3436-01	LRP1	Other Category	0.983633	0.2558	0.509152	No	No	No	Yes	No	Yes
TCGA-AK-3444-01	SOS1	KEGG Cancer Pathway	1.0328	0.5	0.941312	Yes	No	Yes	Yes	No	Both
TCGA-AK-3444-01	FGFR4	Other Category	0.932935	0.3492	0.667681	Yes	No	No	No	No	No
TCGA-AK-3451-01	VHL	Cancer Gene Census	0.867389	0.3253	0.523024	Yes	Yes	Yes	Yes	Both	Both
TCGA-AK-3454-01	PTPN6	Other Category	0.960237	0.3274	0.652348	Yes	No	No	No	NA	No
TCGA-AK-3455-01	CAMK2G	Other Category	0.967843	0.28	0.548138	No	Yes	Yes	No	NA	No
TCGA-AK-3460-01	PDGFRA	Cancer Gene Census	0.819749	0.5179	0.854665	Yes	No	Yes	Yes	No	Both
TCGA-AK-3460-01	MAP2K3	Other Category	0.973318	0.2891	0.578214	Yes	No	No	No	NA	No
TCGA-AK-3460-01	PSMD7	Other Category	1.0118	0.2658	0.572999	Yes	No	No	No	NA	No
TCGA-AK-3460-01	NF1	Cancer Gene Census	0.883943	0.3204	0.533624	Yes	No	No	No	No	No
TCGA-AK-3460-01	PPARD	KEGG Cancer Pathway	0.997825	0.2473	0.50742	Yes	No	No	No	NA	No
TCGA-B0-4690-01	VHL	Cancer Gene Census	1.03357	0.3253	0.734142	Yes	Yes	Yes	Yes	Both	Both
TCGA-B0-4691-01	XPO1	Cancer Gene Census	1.01011	0.2863	0.6205	No	No	Yes	Yes	No	Both
TCGA-B0-4691-01	COL4A2	KEGG Cancer Pathway	0.94288	0.3048	0.575607	No	No	No	Yes	No	Yes
TCGA-B0-4693-01	PIK3CA	Cancer Gene Census	0.991777	0.6235	0.977985	Yes	Yes	Yes	Yes	No	Both
TCGA-B0-4693-01	PLA2G4A	Other Category	0.973096	0.3065	0.620074	No	No	Yes	No	No	No
TCGA-B0-4693-01	MLH1	Cancer Gene Census	0.767656	0.3812	0.525523	No	No	Yes	No	No	No
TCGA-B0-4697-01	PRKCD	Other Category	0.96109	0.3856	0.772352	No	No	Yes	Yes	No	Both
TCGA-B0-4703-01	VHL	Cancer Gene Census	1.03777	0.3253	0.738676	Yes	Yes	Yes	Yes	Both	Both
TCGA-B0-4706-01	VHL	Cancer Gene Census	0.988877	0.3253	0.682948	Yes	Yes	Yes	Yes	Both	Both
TCGA-B0-4710-01	TP53	Cancer Gene Census	1.01962	1	0.999569	Yes	Yes	Yes	Yes	No	Both
TCGA-B0-4710-01	VHL	Cancer Gene Census	0.97539	0.3253	0.6665	Yes	Yes	Yes	Yes	Both	Both
TCGA-B0-4712-01	KDR	Cancer Gene Census	0.86854	0.4104	0.722647	No	No	Yes	Yes	Both	Both
TCGA-B0-4712-01	VHL	Cancer Gene Census	0.988741	0.3253	0.682785	Yes	Yes	Yes	Yes	Both	Both
TCGA-B0-4712-01	TSC2	Cancer Gene Census	0.799109	0.42	0.661205	Yes	No	Yes	Yes	NA	Both
TCGA-B0-4714-01	VHL	Cancer Gene Census	0.975102	0.3253	0.666144	Yes	Yes	Yes	Yes	Both	Both
TCGA-B0-4718-01	PTCH1	KEGG Cancer Pathway	0.991577	0.326	0.687708	Yes	No	Yes	Yes	No	Both
TCGA-B0-4810-01	PIK3R2	KEGG Cancer Pathway	0.921399	0.5168	0.910967	Yes	No	Yes	No	Both	No
TCGA-B0-4810-01	MTOR	KEGG Cancer Pathway	1.00663	0.431	0.873588	Yes	Yes	Yes	Yes	Both	Both
TCGA-B0-4811-01	EP300	Cancer Gene Census	0.590213	0.6339	0.841173	Yes	No	Yes	No	Both	No
TCGA-B0-4811-01	ITGB1	KEGG Cancer Pathway	0.878534	0.4284	0.767613	No	Yes	Yes	No	No	No
TCGA-B0-4811-01	ADCY3	Other Category	0.975268	0.3341	0.6858	No	No	Yes	No	No	No
TCGA-B0-4811-01	IL2RB	Other Category	1.07473	0.2771	0.680909	No	No	Yes	No	No	No
TCGA-B0-4811-01	COL4A6	KEGG Cancer Pathway	0.993027	0.2576	0.526723	Yes	No	Yes	No	No	No
TCGA-B0-4813-01	PRKAR1A	Cancer Gene Census	0.888726	0.3444	0.599542	Yes	No	Yes	No	NA	No
TCGA-B0-4814-01	PTCH1	KEGG Cancer Pathway	0.969018	0.326	0.660169	Yes	No	Yes	Yes	No	Both
TCGA-B0-4814-01	ITGB7	Other Category	0.98449	0.2564	0.511856	No	No	No	Yes	No	Yes
TCGA-B0-4815-01	PRKACA	Other Category	0.769663	0.4981	0.784727	No	No	Yes	No	NA	No
TCGA-B0-4817-01	SMARCA4	Cancer Gene Census	0.978729	0.3139	0.644711	Yes	No	Yes	Yes	No	Both
TCGA-B0-4822-01	VHL	Cancer Gene Census	0.975102	0.3253	0.666144	Yes	Yes	Yes	Yes	Both	Both
TCGA-B0-4827-01	MTOR	KEGG Cancer Pathway	1.00264	0.431	0.871115	Yes	Yes	Yes	Yes	Both	Both
TCGA-B0-4827-01	AKT2	Cancer Gene Census	0.922992	0.4659	0.860629	No	Yes	Yes	No	No	No
TCGA-B0-4827-01	VHL	Cancer Gene Census	0.984304	0.3253	0.67742	Yes	Yes	Yes	Yes	Both	Both
TCGA-B0-4838-01	FGF20	KEGG Cancer Pathway	0.99973	0.3136	0.670304	Yes	No	No	No	No	No
TCGA-B0-4842-01	TERT	Cancer Gene Census	0.976431	0.3251	0.667337	Yes	No	Yes	No	No	No
TCGA-B0-4842-01	NCOR1	Other Category	0.970455	0.3041	0.610867	No	Yes	Yes	No	No	No
TCGA-B0-4843-01	SMARCA4	Cancer Gene Census	0.978771	0.3139	0.644765	Yes	No	Yes	Yes	No	Both
TCGA-B0-4843-01	COL4A3	KEGG Cancer Pathway	0.959494	0.2955	0.57523	No	No	Yes	Yes	No	Both
TCGA-B0-4844-01	NOTCH1	Cancer Gene Census	1.00261	0.3273	0.703473	No	Yes	No	Yes	No	Both
TCGA-B0-4844-01	RPS27A	Other Category	0.967593	0.3052	0.609725	No	No	No	Yes	NA	Yes
TCGA-B0-4846-01	MTOR	KEGG Cancer Pathway	1.01999	0.431	0.881563	Yes	Yes	Yes	Yes	Both	Both
TCGA-B0-4847-01	ADCY8	Other Category	0.95953	0.3297	0.656711	Yes	Yes	No	Yes	Yes	Both
TCGA-B0-4849-01	EGFR	Cancer Gene Census	0.907032	0.6876	0.981474	No	No	Yes	Yes	Both	Both
TCGA-B0-4852-01	MTOR	KEGG Cancer Pathway	0.971243	0.431	0.850227	Yes	Yes	Yes	Yes	Both	Both
TCGA-B0-4852-01	COL4A5	KEGG Cancer Pathway	1.00342	0.2979	0.639122	Yes	Yes	Yes	Yes	Both	Both
TCGA-B0-4945-01	VHL	Cancer Gene Census	0.983391	0.3253	0.676309	Yes	Yes	Yes	Yes	Both	Both
TCGA-B0-5077-01	IRS1	Other Category	0.952346	0.4229	0.824854	Yes	Yes	No	No	No	No
TCGA-B0-5077-01	VHL	Cancer Gene Census	1.00837	0.3253	0.705924	Yes	Yes	Yes	Yes	Both	Both
TCGA-B0-5081-01	VHL	Cancer Gene Census	0.983391	0.3253	0.676309	Yes	Yes	Yes	Yes	Both	Both
TCGA-B0-5081-01	IL6ST	Cancer Gene Census	0.993282	0.264	0.543147	No	No	Yes	No	No	No
TCGA-B0-5088-01	VHL	Cancer Gene Census	0.982315	0.3253	0.674999	Yes	Yes	Yes	Yes	Both	Both
TCGA-B0-5088-01	SIN3A	Other Category	0.99163	0.2876	0.599187	Yes	No	No	No	No	No
TCGA-B0-5092-01	FGFR1	Cancer Gene Census	0.982472	0.4784	0.906978	Yes	No	No	Yes	No	Both
TCGA-B0-5094-01	CBL	Cancer Gene Census	0.871281	0.4165	0.737777	No	No	No	Yes	No	Yes
TCGA-B0-5094-01	INSR	Other Category	0.949406	0.3275	0.638808	No	No	No	Yes	No	Yes
TCGA-B0-5094-01	RASA1	Other Category	0.923535	0.3237	0.595813	No	No	No	Yes	No	Yes
TCGA-B0-5094-01	NOTCH2	Cancer Gene Census	0.982281	0.2689	0.540249	Yes	Yes	No	Yes	No	Both
TCGA-B0-5095-01	FYN	Other Category	0.947626	0.3667	0.722324	No	No	Yes	No	No	No
TCGA-B0-5095-01	ITPR2	Other Category	0.973595	0.3184	0.648571	Yes	No	Yes	Yes	No	Both
TCGA-B0-5095-01	PIAS1	Other Category	0.994001	0.2854	0.597016	Yes	No	Yes	No	No	No
TCGA-B0-5097-01	VHL	Cancer Gene Census	1.02448	0.3253	0.724167	Yes	Yes	Yes	Yes	Both	Both
TCGA-B0-5097-01	SPRY2	Other Category	0.977446	0.2876	0.580115	No	No	Yes	No	No	No
TCGA-B0-5099-01	THBS1	Other Category	1.00221	0.3752	0.793339	Yes	No	Yes	No	NA	No
TCGA-B0-5099-01	ROCK1	Other Category	0.879937	0.3288	0.549149	No	No	Yes	No	NA	No
TCGA-B0-5100-01	MTOR	KEGG Cancer Pathway	0.992741	0.431	0.864813	Yes	Yes	Yes	Yes	Both	Both
TCGA-B0-5100-01	ADCY2	Other Category	0.960138	0.328	0.653597	No	No	Yes	No	NA	No
TCGA-B0-5100-01	COL4A3	KEGG Cancer Pathway	0.980172	0.2955	0.603039	No	No	Yes	Yes	No	Both
TCGA-B0-5102-01	PIK3R5	KEGG Cancer Pathway	1.09415	0.426	0.914431	Yes	Yes	Yes	No	Both	No
TCGA-B0-5102-01	VCAM1	Other Category	0.96686	0.2835	0.555525	Yes	No	No	No	NA	No
TCGA-B0-5104-01	G6PC	Other Category	0.976462	0.2772	0.552998	Yes	No	No	No	No	No
TCGA-B0-5104-01	PARP1	Other Category	0.997802	0.2541	0.52453	Yes	No	No	No	No	No
TCGA-B0-5106-01	PTPN11	Cancer Gene Census	0.986366	0.4965	0.922845	Yes	No	No	No	No	No
TCGA-B0-5106-01	PSMC6	Other Category	0.990076	0.2571	0.521373	Yes	No	No	No	No	No
TCGA-B0-5107-01	VHL	Cancer Gene Census	0.974791	0.3253	0.66576	Yes	Yes	Yes	Yes	Both	Both
TCGA-B0-5108-01	VHL	Cancer Gene Census	1.01155	0.3253	0.709585	Yes	Yes	Yes	Yes	Both	Both
TCGA-B0-5108-01	SOS2	KEGG Cancer Pathway	0.784375	0.3905	0.571746	No	No	Yes	No	No	No
TCGA-B0-5109-01	PRKAG2	Other Category	1.01926	0.2415	0.522547	No	No	Yes	No	Yes	No
TCGA-B0-5110-01	FGF6	KEGG Cancer Pathway	0.976553	0.3543	0.729406	Yes	No	No	No	No	No
TCGA-B0-5115-01	ITGA2	KEGG Cancer Pathway	0.945905	0.3628	0.712404	No	No	No	Yes	No	Yes
TCGA-B0-5116-01	EGFR	Cancer Gene Census	0.965469	0.6876	0.986542	No	No	Yes	Yes	Both	Both
TCGA-B0-5116-01	PIK3CG	KEGG Cancer Pathway	0.920224	0.4616	0.853427	No	No	Yes	Yes	No	Both
TCGA-B0-5119-01	CDKN1A	KEGG Cancer Pathway	0.865731	0.6828	0.975681	Yes	No	No	No	No	No
TCGA-B0-5119-01	MTOR	KEGG Cancer Pathway	0.890352	0.431	0.783607	Yes	Yes	Yes	Yes	Both	Both
TCGA-B0-5119-01	LAMC3	KEGG Cancer Pathway	1.01878	0.2433	0.526415	Yes	No	Yes	No	Both	No
TCGA-B0-5121-01	PDGFRA	Cancer Gene Census	0.959138	0.5179	0.927328	Yes	No	Yes	Yes	No	Both
TCGA-B0-5399-01	STAT1	KEGG Cancer Pathway	0.990759	0.4768	0.909471	Yes	No	No	No	No	No
TCGA-B0-5399-01	FGFR4	Other Category	0.933424	0.3492	0.668283	Yes	No	No	No	No	No
TCGA-B0-5399-01	VHL	Cancer Gene Census	0.972951	0.3253	0.66348	Yes	Yes	Yes	Yes	Both	Both
TCGA-B0-5400-01	KRAS	Cancer Gene Census	1.00344	0.6499	0.984095	No	No	Yes	No	No	No
TCGA-B0-5691-01	MTOR	KEGG Cancer Pathway	0.92042	0.431	0.810601	Yes	Yes	Yes	Yes	Both	Both
TCGA-B0-5691-01	MMP2	KEGG Cancer Pathway	0.876739	0.3549	0.608957	Yes	No	Yes	No	No	No
TCGA-B0-5691-01	ROCK2	Other Category	0.988128	0.2721	0.556295	Yes	No	No	No	No	No
TCGA-B0-5692-01	CHEK2	Cancer Gene Census	0.928136	0.3688	0.704517	No	No	Yes	Yes	No	Both
TCGA-B0-5692-01	CDH1	Cancer Gene Census	0.487288	0.5652	0.599033	No	No	Yes	No	No	No
TCGA-B0-5695-01	TP73	Other Category	1.03095	0.3055	0.690258	Yes	No	No	No	No	No
TCGA-B0-5696-01	MTOR	KEGG Cancer Pathway	1.00153	0.431	0.870424	Yes	Yes	Yes	Yes	Both	Both
TCGA-B0-5696-01	ABL1	Cancer Gene Census	0.764117	0.4828	0.751784	Yes	No	Yes	No	No	No
TCGA-B0-5696-01	RPTOR	Other Category	1.0072	0.2863	0.616678	No	No	Yes	No	No	No
TCGA-B0-5697-01	MTOR	KEGG Cancer Pathway	0.901653	0.431	0.794068	Yes	Yes	Yes	Yes	Both	Both
TCGA-B0-5697-01	EGR1	Other Category	0.899622	0.3292	0.577049	Yes	No	No	No	No	No
TCGA-B0-5698-01	GNAI2	Other Category	1.00523	0.3184	0.687529	Yes	No	No	No	No	No
TCGA-B0-5699-01	ABCB1	Other Category	0.955229	0.3077	0.599331	Yes	No	Yes	No	No	No
TCGA-B0-5699-01	PTK2B	Other Category	0.975492	0.2938	0.592661	Yes	No	Yes	No	No	No
TCGA-B0-5699-01	VAV1	Other Category	0.896631	0.3092	0.523021	Yes	No	Yes	No	No	No
TCGA-B0-5701-01	MTOR	KEGG Cancer Pathway	0.941465	0.431	0.82791	Yes	Yes	Yes	Yes	Both	Both
TCGA-B0-5702-01	PPARG	Cancer Gene Census	0.994104	0.4077	0.835926	Yes	No	No	No	No	No
TCGA-B0-5702-01	SMARCA4	Cancer Gene Census	1.0083	0.3139	0.681399	Yes	No	Yes	Yes	No	Both
TCGA-B0-5703-01	MAPK14	Other Category	1.02584	0.4533	0.905929	Yes	No	No	No	No	No
TCGA-B0-5703-01	VHL	Cancer Gene Census	0.979196	0.3253	0.671185	Yes	Yes	Yes	Yes	Both	Both
TCGA-B0-5703-01	SIRT1	Other Category	0.976293	0.3016	0.612578	Yes	No	No	No	No	No
TCGA-B0-5705-01	STAT3	Cancer Gene Census	0.984291	0.5478	0.952028	Yes	No	No	No	No	No
TCGA-B0-5705-01	VHL	Cancer Gene Census	0.987946	0.3253	0.681827	Yes	Yes	Yes	Yes	Both	Both
TCGA-B0-5706-01	CREBBP	Cancer Gene Census	0.976552	0.6109	0.972932	Yes	Yes	No	No	No	No
TCGA-B0-5707-01	HDAC1	KEGG Cancer Pathway	0.757159	0.5051	0.784924	Yes	No	No	No	No	No
TCGA-B0-5707-01	MET	Cancer Gene Census	0.808839	0.3927	0.609962	Yes	No	Yes	Yes	Both	Both
TCGA-B0-5709-01	TSC2	Cancer Gene Census	0.965089	0.42	0.830776	Yes	No	Yes	Yes	NA	Both
TCGA-B0-5709-01	NOS2	KEGG Cancer Pathway	0.972647	0.3208	0.65288	No	Yes	Yes	No	No	No
TCGA-B0-5709-01	COL4A5	KEGG Cancer Pathway	0.996876	0.2979	0.630697	Yes	Yes	Yes	Yes	Both	Both
TCGA-B0-5710-01	VHL	Cancer Gene Census	0.968838	0.3253	0.658357	Yes	Yes	Yes	Yes	Both	Both
TCGA-B0-5710-01	RPS6KA1	Other Category	0.962315	0.2847	0.552278	Yes	No	Yes	No	No	No
TCGA-B0-5713-01	EGFR	Cancer Gene Census	0.926445	0.6876	0.983337	No	No	Yes	Yes	Both	Both
TCGA-B0-5713-01	EP300	Cancer Gene Census	0.94452	0.6339	0.974322	Yes	No	Yes	No	Both	No
TCGA-B0-5713-01	PIK3CA	Cancer Gene Census	0.945883	0.6235	0.971769	Yes	Yes	Yes	Yes	No	Both
TCGA-B0-5713-01	MAPK10	KEGG Cancer Pathway	1.02114	0.3785	0.815131	No	No	Yes	No	No	No
TCGA-B0-5713-01	PLD1	KEGG Cancer Pathway	0.999821	0.2991	0.637305	Yes	No	Yes	No	No	No
TCGA-B0-5713-01	ADCY5	Other Category	0.89824	0.3414	0.604953	Yes	No	Yes	Yes	No	Both
TCGA-B0-5812-01	APC	Cancer Gene Census	0.968795	0.5143	0.928487	Yes	No	No	No	NA	No
TCGA-B2-4101-01	AKT2	Cancer Gene Census	0.976634	0.4659	0.892703	No	Yes	Yes	No	No	No
TCGA-B2-4101-01	PTGS2	KEGG Cancer Pathway	0.937982	0.4532	0.855156	Yes	Yes	No	Yes	No	Both
TCGA-B2-5641-01	BRCA2	Cancer Gene Census	0.932158	0.4978	0.899664	Yes	No	Yes	No	No	No
TCGA-B4-5377-01	SMARCA4	Cancer Gene Census	0.945344	0.3139	0.601166	Yes	No	Yes	Yes	No	Both
TCGA-B8-4143-01	BRAF	Cancer Gene Census	0.930691	0.5242	0.920696	No	No	No	Yes	No	Yes
TCGA-B8-4143-01	ITPR2	Other Category	0.972485	0.3184	0.647163	Yes	No	Yes	Yes	No	Both
TCGA-B8-4143-01	SMO	Cancer Gene Census	0.98607	0.282	0.578018	No	No	No	Yes	No	Yes
TCGA-B8-4148-01	RELA	KEGG Cancer Pathway	0.999734	0.5105	0.936865	Yes	No	No	No	No	No
TCGA-B8-4151-01	PGR	Other Category	0.995821	0.2757	0.575722	No	No	Yes	No	No	No
TCGA-B8-4153-01	VHL	Cancer Gene Census	1.11039	0.3253	0.808869	Yes	Yes	Yes	Yes	Both	Both
TCGA-B8-4153-01	PTCH1	KEGG Cancer Pathway	0.961702	0.326	0.650989	Yes	No	Yes	Yes	No	Both
TCGA-B8-4154-01	SOS1	KEGG Cancer Pathway	0.932902	0.5	0.902017	Yes	No	Yes	Yes	No	Both
TCGA-B8-4621-01	CREBBP	Cancer Gene Census	0.962097	0.6109	0.970734	Yes	Yes	No	No	No	No
TCGA-B8-4621-01	VHL	Cancer Gene Census	1.05802	0.3253	0.75981	Yes	Yes	Yes	Yes	Both	Both
TCGA-B8-4622-01	ATM	Cancer Gene Census	0.891745	0.4452	0.80813	Yes	Yes	No	Yes	No	Both
TCGA-B8-5158-01	EP300	Cancer Gene Census	0.930418	0.6339	0.972287	Yes	No	Yes	No	Both	No
TCGA-B8-5158-01	LAMC3	KEGG Cancer Pathway	1.00146	0.2433	0.502375	Yes	No	Yes	No	Both	No
TCGA-B8-5159-01	AR	KEGG Cancer Pathway	0.983274	0.6359	0.979602	Yes	No	No	No	No	No
TCGA-B8-5163-01	PIK3CB	KEGG Cancer Pathway	1.00454	0.4551	0.897034	No	No	Yes	No	No	No
TCGA-B8-5163-01	VHL	Cancer Gene Census	0.976037	0.3253	0.667298	Yes	Yes	Yes	Yes	Both	Both
TCGA-B8-5164-01	ABCB1	Other Category	0.9884	0.3077	0.642684	Yes	No	Yes	No	No	No
TCGA-B8-5164-01	PRKCQ	Other Category	0.933765	0.322	0.605334	No	No	Yes	No	No	No
TCGA-B8-5549-01	VHL	Cancer Gene Census	0.979867	0.3253	0.672007	Yes	Yes	Yes	Yes	Both	Both
TCGA-B8-5550-01	VHL	Cancer Gene Census	0.968838	0.3253	0.658357	Yes	Yes	Yes	Yes	Both	Both
TCGA-B8-5551-01	VHL	Cancer Gene Census	1.00576	0.3253	0.702903	Yes	Yes	Yes	Yes	Both	Both
TCGA-B8-5551-01	CAMK2A	Other Category	0.957564	0.3454	0.689168	Yes	No	No	No	No	No
TCGA-B8-5551-01	PLCB4	Other Category	0.994262	0.2971	0.625417	Yes	No	No	No	No	No
TCGA-B8-5552-01	HSP90AA1	KEGG Cancer Pathway	0.926608	0.4379	0.826061	Yes	No	Yes	No	No	No
TCGA-B8-5553-01	PIK3R2	KEGG Cancer Pathway	0.791735	0.5168	0.832698	Yes	No	Yes	No	Both	No
TCGA-BP-4159-01	ABL1	Cancer Gene Census	1.01303	0.4828	0.923545	Yes	No	Yes	No	No	No
TCGA-BP-4159-01	VHL	Cancer Gene Census	0.992568	0.3253	0.687373	Yes	Yes	Yes	Yes	Both	Both
TCGA-BP-4159-01	PPP3CA	Other Category	0.912574	0.3179	0.566745	Yes	No	No	No	No	No
TCGA-BP-4160-01	PIK3CA	Cancer Gene Census	0.991777	0.6235	0.977985	Yes	Yes	Yes	Yes	No	Both
TCGA-BP-4160-01	BRCA1	Cancer Gene Census	0.770694	0.5705	0.883914	Yes	Yes	Yes	No	No	No
TCGA-BP-4160-01	JAK2	Cancer Gene Census	1.01812	0.4133	0.860353	Yes	No	Yes	No	No	No
TCGA-BP-4160-01	LDLR	Other Category	0.995825	0.2756	0.575481	No	No	Yes	No	No	No
TCGA-BP-4160-01	FLT1	Other Category	0.851496	0.3322	0.518363	No	No	Yes	No	No	No
TCGA-BP-4161-01	MAPK9	KEGG Cancer Pathway	0.997637	0.415	0.848329	Yes	No	Yes	No	No	No
TCGA-BP-4162-01	VHL	Cancer Gene Census	0.975102	0.3253	0.666144	Yes	Yes	Yes	Yes	Both	Both
TCGA-BP-4162-01	ITGA6	KEGG Cancer Pathway	0.913369	0.3013	0.526332	Yes	No	Yes	No	No	No
TCGA-BP-4164-01	VHL	Cancer Gene Census	0.885446	0.3253	0.547981	Yes	Yes	Yes	Yes	Both	Both
TCGA-BP-4166-01	VHL	Cancer Gene Census	1.03144	0.3253	0.731825	Yes	Yes	Yes	Yes	Both	Both
TCGA-BP-4167-01	PCK2	Other Category	0.977043	0.275	0.548301	No	No	Yes	No	NA	No
TCGA-BP-4169-01	TGFBR2	KEGG Cancer Pathway	0.986956	0.4401	0.871644	No	Yes	No	No	No	No
TCGA-BP-4174-01	GATA2	Cancer Gene Census	0.997778	0.3668	0.774825	Yes	Yes	No	Yes	No	Both
TCGA-BP-4176-01	TP53	Cancer Gene Census	1.04166	1	0.999619	Yes	Yes	Yes	Yes	No	Both
TCGA-BP-4176-01	ITPR3	Other Category	0.991454	0.3024	0.634252	Yes	No	Yes	No	No	No
TCGA-BP-4326-01	NF1	Cancer Gene Census	0.966124	0.3204	0.643694	Yes	No	No	No	No	No
TCGA-BP-4326-01	INHBA	Other Category	0.969779	0.3051	0.612373	Yes	No	No	No	No	No
TCGA-BP-4326-01	RALB	KEGG Cancer Pathway	0.987298	0.2592	0.522811	Yes	No	No	No	No	No
TCGA-BP-4329-01	GRB2	KEGG Cancer Pathway	0.961792	0.5374	0.940361	No	No	Yes	No	No	No
TCGA-BP-4329-01	MAPK9	KEGG Cancer Pathway	1.00188	0.415	0.851338	Yes	No	Yes	No	No	No
TCGA-BP-4329-01	VHL	Cancer Gene Census	0.986348	0.3253	0.679897	Yes	Yes	Yes	Yes	Both	Both
TCGA-BP-4331-01	CREBBP	Cancer Gene Census	0.9775	0.6109	0.97307	Yes	Yes	No	No	No	No
TCGA-BP-4331-01	ITPR2	Other Category	0.932567	0.3184	0.595017	Yes	No	Yes	Yes	No	Both
TCGA-BP-4337-01	PTCH1	KEGG Cancer Pathway	0.991577	0.326	0.687708	Yes	No	Yes	Yes	No	Both
TCGA-BP-4340-01	VHL	Cancer Gene Census	1.03415	0.3253	0.734766	Yes	Yes	Yes	Yes	Both	Both
TCGA-BP-4341-01	EGFR	Cancer Gene Census	0.917426	0.6876	0.982495	No	No	Yes	Yes	Both	Both
TCGA-BP-4341-01	RPS6KB2	Other Category	0.934256	0.2827	0.508435	No	No	Yes	No	NA	No
TCGA-BP-4341-01	MAP3K5	Other Category	0.977796	0.2565	0.502809	No	No	Yes	No	NA	No
TCGA-BP-4342-01	VHL	Cancer Gene Census	1.01488	0.3253	0.713385	Yes	Yes	Yes	Yes	Both	Both
TCGA-BP-4343-01	CDK4	Cancer Gene Census	0.896003	0.4998	0.882129	No	No	Yes	No	No	No
TCGA-BP-4345-01	MMP2	KEGG Cancer Pathway	0.907771	0.3549	0.649171	Yes	No	Yes	No	No	No
TCGA-BP-4349-01	VHL	Cancer Gene Census	0.981956	0.3253	0.674561	Yes	Yes	Yes	Yes	Both	Both
TCGA-BP-4351-01	WNT11	KEGG Cancer Pathway	0.964988	0.2908	0.571092	No	No	Yes	No	No	No
TCGA-BP-4354-01	EGFR	Cancer Gene Census	1.02228	0.6876	0.99015	No	No	Yes	Yes	Both	Both
TCGA-BP-4759-01	VHL	Cancer Gene Census	1.00759	0.3253	0.705025	Yes	Yes	Yes	Yes	Both	Both
TCGA-BP-4761-01	KDR	Cancer Gene Census	0.937202	0.4104	0.792364	No	No	Yes	Yes	Both	Both
TCGA-BP-4761-01	PIK3R5	KEGG Cancer Pathway	0.907418	0.426	0.791036	Yes	Yes	Yes	No	Both	No
TCGA-BP-4762-01	VHL	Cancer Gene Census	1.02602	0.3253	0.72587	Yes	Yes	Yes	Yes	Both	Both
TCGA-BP-4763-01	VHL	Cancer Gene Census	0.999267	0.3253	0.695317	Yes	Yes	Yes	Yes	Both	Both
TCGA-BP-4768-01	SMAD4	KEGG Cancer Pathway	0.98277	0.4899	0.916448	Yes	No	No	No	No	No
TCGA-BP-4768-01	PTCH1	KEGG Cancer Pathway	0.995812	0.326	0.69274	Yes	No	Yes	Yes	No	Both
TCGA-BP-4770-01	RB1	Cancer Gene Census	0.983682	0.5507	0.953197	No	No	No	Yes	No	No
TCGA-BP-4770-01	TP53	Cancer Gene Census	0	1	0.936382	Yes	Yes	Yes	Yes	No	Both
TCGA-BP-4771-01	VHL	Cancer Gene Census	0.979196	0.3253	0.671185	Yes	Yes	Yes	Yes	Both	Both
TCGA-BP-4771-01	ADCY1	Other Category	0.951339	0.3357	0.660094	No	No	No	Yes	No	Yes
TCGA-BP-4771-01	ATF1	Cancer Gene Census	0.920454	0.3348	0.618451	No	No	No	Yes	No	Yes
TCGA-BP-4775-01	ADCY8	Other Category	0.989153	0.3297	0.692814	Yes	Yes	No	Yes	Yes	Both
TCGA-BP-4775-01	ITGA1	Other Category	0.987253	0.2823	0.580358	Yes	No	Yes	No	No	No
TCGA-BP-4777-01	STAT1	KEGG Cancer Pathway	0.947284	0.4768	0.887511	Yes	No	No	No	No	No
TCGA-BP-4777-01	PTCH1	KEGG Cancer Pathway	0.996337	0.326	0.693361	Yes	No	Yes	Yes	No	Both
TCGA-BP-4782-01	ITPR2	Other Category	0.981603	0.3184	0.658647	Yes	No	Yes	Yes	No	Both
TCGA-BP-4782-01	KAT2B	Other Category	0.975192	0.3176	0.648754	Yes	No	No	No	NA	No
TCGA-BP-4782-01	PLD1	KEGG Cancer Pathway	0.975601	0.2991	0.605655	Yes	No	Yes	No	No	No
TCGA-BP-4797-01	NFKB1	KEGG Cancer Pathway	0.976402	0.5508	0.951405	No	No	Yes	No	No	No
TCGA-BP-4797-01	AKT2	Cancer Gene Census	0.918493	0.4659	0.857603	No	Yes	Yes	No	No	No
TCGA-BP-4801-01	TSC2	Cancer Gene Census	0.991208	0.42	0.850216	Yes	No	Yes	Yes	NA	Both
TCGA-BP-4804-01	STAT1	KEGG Cancer Pathway	0.931176	0.4768	0.878259	Yes	No	No	No	No	No
TCGA-BP-4804-01	TLR4	Other Category	0.81936	0.3612	0.546772	Yes	No	No	No	NA	No
TCGA-BP-4960-01	PIK3CA	Cancer Gene Census	0.921576	0.6235	0.967817	Yes	Yes	Yes	Yes	No	Both
TCGA-BP-4960-01	VHL	Cancer Gene Census	0.991506	0.3253	0.686103	Yes	Yes	Yes	Yes	Both	Both
TCGA-BP-4960-01	NOS2	KEGG Cancer Pathway	0.98203	0.3208	0.664602	No	Yes	Yes	No	No	No
TCGA-BP-4963-01	LEPR	Other Category	0.95774	0.2826	0.540722	Yes	No	No	No	NA	No
TCGA-BP-4964-01	ATM	Cancer Gene Census	0.921266	0.4452	0.832293	Yes	Yes	No	Yes	No	Both
TCGA-BP-4964-01	VHL	Cancer Gene Census	1.00293	0.3253	0.699615	Yes	Yes	Yes	Yes	Both	Both
TCGA-BP-4964-01	SMARCA4	Cancer Gene Census	0.929338	0.3139	0.579658	Yes	No	Yes	Yes	No	Both
TCGA-BP-4967-01	SOS1	KEGG Cancer Pathway	0.966526	0.5	0.917338	Yes	No	Yes	Yes	No	Both
TCGA-BP-4967-01	VHL	Cancer Gene Census	1.00269	0.3253	0.699334	Yes	Yes	Yes	Yes	Both	Both
TCGA-BP-4967-01	ITGA1	Other Category	0.962419	0.2823	0.546422	Yes	No	Yes	No	No	No
TCGA-BP-4967-01	RXRG	KEGG Cancer Pathway	0.972619	0.2743	0.54045	No	No	Yes	No	No	No
TCGA-BP-4971-01	TERT	Cancer Gene Census	0.932621	0.3251	0.611276	Yes	No	Yes	No	No	No
TCGA-BP-4972-01	MSH6	Cancer Gene Census	0.875486	0.3521	0.600537	Yes	No	Yes	No	No	No
TCGA-BP-4973-01	CTNNB1	Cancer Gene Census	0.988615	0.6657	0.985258	No	No	Yes	No	NA	No
TCGA-BP-4975-01	VHL	Cancer Gene Census	1.02448	0.3253	0.724167	Yes	Yes	Yes	Yes	Both	Both
TCGA-BP-4976-01	JAK2	Cancer Gene Census	0.988327	0.4133	0.839248	Yes	No	Yes	No	No	No
TCGA-BP-4976-01	LAMA1	KEGG Cancer Pathway	0.985134	0.2637	0.531135	Yes	No	No	No	NA	No
TCGA-BP-4977-01	THBS1	Other Category	0.935817	0.3752	0.726353	Yes	No	Yes	No	NA	No
TCGA-BP-4977-01	ADCY9	Other Category	0.924938	0.3371	0.629744	Yes	Yes	Yes	No	No	No
TCGA-BP-4981-01	HSP90AA1	KEGG Cancer Pathway	0.915994	0.4379	0.817422	Yes	No	Yes	No	No	No
TCGA-BP-4981-01	COL4A5	KEGG Cancer Pathway	0.982896	0.2979	0.612424	Yes	Yes	Yes	Yes	Both	Both
TCGA-BP-4981-01	PRKCH	Other Category	1.03162	0.2631	0.593143	No	No	Yes	No	NA	No
TCGA-BP-4981-01	VAV1	Other Category	0.901192	0.3092	0.529341	Yes	No	Yes	No	No	No
TCGA-BP-4985-01	SOS1	KEGG Cancer Pathway	0.999311	0.5	0.930145	Yes	No	Yes	Yes	No	Both
TCGA-BP-4985-01	TAB2	Other Category	0.987779	0.2618	0.53002	No	No	Yes	No	No	No
TCGA-BP-4986-01	VHL	Cancer Gene Census	1.11039	0.3253	0.808869	Yes	Yes	Yes	Yes	Both	Both
TCGA-BP-4988-01	VHL	Cancer Gene Census	0.991506	0.3253	0.686103	Yes	Yes	Yes	Yes	Both	Both
TCGA-BP-4989-01	AXIN1	Cancer Gene Census	0.958743	0.3149	0.621257	No	No	Yes	No	No	No
TCGA-BP-4989-01	FN1	KEGG Cancer Pathway	0.831182	0.3547	0.546793	Yes	No	Yes	No	No	No
TCGA-BP-4991-01	TRRAP	Cancer Gene Census	1.0099	0.2429	0.513092	Yes	No	No	No	NA	No
TCGA-BP-4992-01	SMARCA4	Cancer Gene Census	0.992983	0.3139	0.662642	Yes	No	Yes	Yes	No	Both
TCGA-BP-4992-01	RHEB	Other Category	0.990777	0.294	0.613475	Yes	No	No	Yes	NA	Both
TCGA-BP-4993-01	ADCY5	Other Category	0.984042	0.3414	0.711568	Yes	No	Yes	Yes	No	Both
TCGA-BP-4993-01	ITGA3	KEGG Cancer Pathway	0.973122	0.3422	0.70065	Yes	No	No	No	NA	No
TCGA-BP-4995-01	RAD51	KEGG Cancer Pathway	0.870891	0.343	0.57207	Yes	No	No	No	No	No
TCGA-BP-4998-01	BRCA1	Cancer Gene Census	0.880243	0.5705	0.933322	Yes	Yes	Yes	No	No	No
TCGA-BP-4998-01	VHL	Cancer Gene Census	0.992568	0.3253	0.687373	Yes	Yes	Yes	Yes	Both	Both
TCGA-BP-4998-01	WNT10A	KEGG Cancer Pathway	0.973675	0.3072	0.622494	Yes	No	No	No	NA	No
TCGA-BP-4999-01	VHL	Cancer Gene Census	1.00293	0.3253	0.699615	Yes	Yes	Yes	Yes	Both	Both
TCGA-BP-4999-01	TPR	Cancer Gene Census	0.901322	0.31	0.531532	Yes	No	Yes	No	NA	No
TCGA-BP-5001-01	MTOR	KEGG Cancer Pathway	0.978726	0.431	0.855445	Yes	Yes	Yes	Yes	Both	Both
TCGA-BP-5004-01	VHL	Cancer Gene Census	1.06923	0.3253	0.770991	Yes	Yes	Yes	Yes	Both	Both
TCGA-BP-5006-01	VHL	Cancer Gene Census	0.992989	0.3253	0.687875	Yes	Yes	Yes	Yes	Both	Both
TCGA-BP-5007-01	MTOR	KEGG Cancer Pathway	0.995715	0.431	0.866734	Yes	Yes	Yes	Yes	Both	Both
TCGA-BP-5009-01	JUN	Cancer Gene Census	0.880654	0.5588	0.925741	Yes	Yes	No	No	No	No
TCGA-BP-5009-01	AKT3	KEGG Cancer Pathway	0.982333	0.4429	0.871932	Yes	No	No	No	NA	No
TCGA-BP-5009-01	FN1	KEGG Cancer Pathway	0.948826	0.3547	0.698792	Yes	No	Yes	No	No	No
TCGA-BP-5009-01	VHL	Cancer Gene Census	0.991801	0.3253	0.686456	Yes	Yes	Yes	Yes	Both	Both
TCGA-BP-5009-01	TERT	Cancer Gene Census	0.986433	0.3251	0.67956	Yes	No	Yes	No	No	No
TCGA-BP-5009-01	CSK	Other Category	0.995182	0.2473	0.503747	Yes	No	No	No	NA	No
TCGA-BP-5010-01	KDR	Cancer Gene Census	0.97282	0.4104	0.823056	No	No	Yes	Yes	Both	Both
TCGA-BP-5168-01	COL4A1	KEGG Cancer Pathway	0.991425	0.3156	0.66454	Yes	No	No	No	NA	No
TCGA-BP-5169-01	VHL	Cancer Gene Census	0.9795	0.3253	0.671558	Yes	Yes	Yes	Yes	Both	Both
TCGA-BP-5169-01	VWF	Other Category	1.00051	0.2544	0.529034	Yes	No	No	No	No	No
TCGA-BP-5174-01	GATA2	Cancer Gene Census	0.976031	0.3668	0.753041	Yes	Yes	No	Yes	No	Both
TCGA-BP-5175-01	MTOR	KEGG Cancer Pathway	0.941465	0.431	0.82791	Yes	Yes	Yes	Yes	Both	Both
TCGA-BP-5175-01	VHL	Cancer Gene Census	1.02448	0.3253	0.724167	Yes	Yes	Yes	Yes	Both	Both
TCGA-BP-5175-01	WT1	Cancer Gene Census	0.959727	0.301	0.58905	Yes	No	No	No	NA	No
TCGA-BP-5176-01	SMAD2	KEGG Cancer Pathway	0.970643	0.4494	0.872003	Yes	No	No	No	NA	No
TCGA-BP-5176-01	MTOR	KEGG Cancer Pathway	0.973393	0.431	0.851742	Yes	Yes	Yes	Yes	Both	Both
TCGA-BP-5176-01	HGF	KEGG Cancer Pathway	0.984695	0.3511	0.731954	Yes	No	No	No	NA	No
TCGA-BP-5176-01	NF1	Cancer Gene Census	0.936487	0.3204	0.60509	Yes	No	No	No	No	No
TCGA-BP-5176-01	MAP2K3	Other Category	0.980053	0.2891	0.587315	Yes	No	No	No	NA	No
TCGA-BP-5177-01	VHL	Cancer Gene Census	0.991033	0.3253	0.685536	Yes	Yes	Yes	Yes	Both	Both
TCGA-BP-5177-01	WNT7B	KEGG Cancer Pathway	0.978924	0.2966	0.604036	Yes	No	No	No	NA	No
TCGA-BP-5183-01	TCF7	KEGG Cancer Pathway	0.990729	0.2634	0.538118	Yes	No	Yes	No	NA	No
TCGA-BP-5183-01	XPO1	Cancer Gene Census	0.934917	0.2863	0.518431	No	No	Yes	Yes	No	Both
TCGA-BP-5185-01	TNFRSF1A	Other Category	0.985438	0.3189	0.664548	Yes	No	No	No	NA	No
TCGA-BP-5185-01	ATR	Other Category	0.928566	0.3031	0.551827	Yes	No	No	No	NA	No
TCGA-BP-5186-01	FZD10	KEGG Cancer Pathway	0.965561	0.2806	0.546497	Yes	No	No	No	No	No
TCGA-BP-5187-01	THBS1	Other Category	0.994364	0.3752	0.786101	Yes	No	Yes	No	NA	No
TCGA-BP-5191-01	PRKCD	Other Category	0.822332	0.3856	0.610751	No	No	Yes	Yes	No	Both
TCGA-BP-5191-01	CTBP1	KEGG Cancer Pathway	0.982401	0.2827	0.574765	No	No	Yes	No	No	No
TCGA-BP-5192-01	GNAS	Cancer Gene Census	1.00245	0.3305	0.709973	Yes	No	No	Yes	No	Both
TCGA-BP-5192-01	COL4A5	KEGG Cancer Pathway	0.985508	0.2979	0.615864	Yes	Yes	Yes	Yes	Both	Both
TCGA-BP-5195-01	VHL	Cancer Gene Census	1.03777	0.3253	0.738676	Yes	Yes	Yes	Yes	Both	Both
TCGA-BP-5196-01	VHL	Cancer Gene Census	0.993191	0.3253	0.688117	Yes	Yes	Yes	Yes	Both	Both
TCGA-BP-5198-01	BMPR2	Other Category	0.984763	0.3055	0.632884	Yes	No	Yes	No	No	No
TCGA-BP-5199-01	SHH	KEGG Cancer Pathway	0.971934	0.2674	0.52216	No	Yes	No	No	No	No
TCGA-BP-5200-01	PRKACB	Other Category	0.827556	0.419	0.693529	No	Yes	Yes	No	NA	No
TCGA-BP-5201-01	BMPR1B	Other Category	0.985317	0.2682	0.542683	No	No	No	Yes	No	Yes
TCGA-BP-5202-01	FGFR2	Cancer Gene Census	0.706493	0.4407	0.589741	Yes	No	Yes	No	NA	No
TCGA-CJ-4634-01	TGFB2	KEGG Cancer Pathway	0.955908	0.4312	0.839319	Yes	No	No	No	NA	No
TCGA-CJ-4636-01	ADCY9	Other Category	0.988227	0.3371	0.707414	Yes	Yes	Yes	No	No	No
TCGA-CJ-4636-01	VHL	Cancer Gene Census	0.983391	0.3253	0.676309	Yes	Yes	Yes	Yes	Both	Both
TCGA-CJ-4636-01	ITPR3	Other Category	0.98278	0.3024	0.622998	Yes	No	Yes	No	No	No
TCGA-CJ-4637-01	ADCY5	Other Category	0.995725	0.3414	0.724709	Yes	No	Yes	Yes	No	Both
TCGA-CJ-4637-01	CHEK2	Cancer Gene Census	0.928136	0.3688	0.704517	No	No	Yes	Yes	No	Both
TCGA-CJ-4637-01	ELK1	Other Category	0.955982	0.3482	0.693324	No	No	No	Yes	NA	Yes
TCGA-CJ-4638-01	VHL	Cancer Gene Census	0.976037	0.3253	0.667298	Yes	Yes	Yes	Yes	Both	Both
TCGA-CJ-4638-01	COL4A5	KEGG Cancer Pathway	0.979842	0.2979	0.608387	Yes	Yes	Yes	Yes	Both	Both
TCGA-CJ-4639-01	ADCY9	Other Category	0.924059	0.3371	0.628604	Yes	Yes	Yes	No	No	No
TCGA-CJ-4640-01	CBLB	Cancer Gene Census	0.970305	0.3313	0.673643	No	No	Yes	No	No	No
TCGA-CJ-4641-01	AXIN2	KEGG Cancer Pathway	0.885874	0.3131	0.517926	No	No	No	Yes	NA	Yes
TCGA-CJ-4643-01	BRCA1	Cancer Gene Census	0.945439	0.5705	0.952629	Yes	Yes	Yes	No	No	No
TCGA-CJ-4643-01	IRS1	Other Category	0.927851	0.4229	0.80431	Yes	Yes	No	No	No	No
TCGA-CJ-4644-01	MTOR	KEGG Cancer Pathway	0.999869	0.431	0.869379	Yes	Yes	Yes	Yes	Both	Both
TCGA-CJ-4644-01	GNAS	Cancer Gene Census	0.90145	0.3305	0.58272	Yes	No	No	Yes	No	Both
TCGA-CJ-4868-01	EGFR	Cancer Gene Census	0.907032	0.6876	0.981474	No	No	Yes	Yes	Both	Both
TCGA-CJ-4868-01	COL4A3	KEGG Cancer Pathway	0.909161	0.2955	0.505871	No	No	Yes	Yes	No	Both
TCGA-CJ-4872-01	VHL	Cancer Gene Census	1.03777	0.3253	0.738676	Yes	Yes	Yes	Yes	Both	Both
TCGA-CJ-4873-01	PIK3CA	Cancer Gene Census	0.953583	0.6235	0.97292	Yes	Yes	Yes	Yes	No	Both
TCGA-CJ-4873-01	HSP90AA1	KEGG Cancer Pathway	0.967269	0.4379	0.856184	Yes	No	Yes	No	No	No
TCGA-CJ-4873-01	MSH6	Cancer Gene Census	0.896094	0.3521	0.627671	Yes	No	Yes	No	No	No
TCGA-CJ-4874-01	HRAS	Cancer Gene Census	0.87201	0.5483	0.914433	Yes	No	No	No	No	No
TCGA-CJ-4875-01	SOS1	KEGG Cancer Pathway	1.00568	0.5	0.93241	Yes	No	Yes	Yes	No	Both
TCGA-CJ-4875-01	PTCH2	KEGG Cancer Pathway	1.0114	0.2457	0.522227	No	No	No	Yes	NA	Yes
TCGA-CJ-4876-01	PIK3R5	KEGG Cancer Pathway	0.907418	0.426	0.791036	Yes	Yes	Yes	No	Both	No
TCGA-CJ-4881-01	ITGA6	KEGG Cancer Pathway	0.919327	0.3013	0.534579	Yes	No	Yes	No	No	No
TCGA-CJ-4885-01	VHL	Cancer Gene Census	0.971525	0.3253	0.661709	Yes	Yes	Yes	Yes	Both	Both
TCGA-CJ-4886-01	PIK3CA	Cancer Gene Census	0.945883	0.6235	0.971769	Yes	Yes	Yes	Yes	No	Both
TCGA-CJ-4887-01	MTOR	KEGG Cancer Pathway	0.925323	0.431	0.814749	Yes	Yes	Yes	Yes	Both	Both
TCGA-CJ-4889-01	TCEB1	KEGG Cancer Pathway	0.987158	0.2602	0.525134	Yes	No	No	No	NA	No
TCGA-CJ-4889-01	TNC	Other Category	0.996517	0.2536	0.521489	Yes	No	No	No	NA	No
TCGA-CJ-4891-01	PIK3CG	KEGG Cancer Pathway	0.961162	0.4616	0.879664	No	No	Yes	Yes	No	Both
TCGA-CJ-4893-01	RARB	KEGG Cancer Pathway	0.976461	0.2729	0.542242	Yes	No	No	No	NA	No
TCGA-CJ-4894-01	VHL	Cancer Gene Census	0.972064	0.3253	0.662379	Yes	Yes	Yes	Yes	Both	Both
TCGA-CJ-4895-01	RHEB	Other Category	0.990777	0.294	0.613475	Yes	No	No	Yes	NA	Both
TCGA-CJ-4899-01	WNT3A	KEGG Cancer Pathway	0.975795	0.3356	0.68968	Yes	No	No	No	NA	No
TCGA-CJ-4901-01	TLN1	Other Category	0.981011	0.2681	0.536487	Yes	No	Yes	No	No	No
TCGA-CJ-4902-01	RPS6KA1	Other Category	0.980139	0.2847	0.576625	Yes	No	Yes	No	No	No
TCGA-CJ-4902-01	PCK1	Other Category	0.982365	0.2593	0.516219	No	No	Yes	No	NA	No
TCGA-CJ-4903-01	VHL	Cancer Gene Census	0.993191	0.3253	0.688117	Yes	Yes	Yes	Yes	Both	Both
TCGA-CJ-4904-01	ATM	Cancer Gene Census	0.952265	0.4452	0.854985	Yes	Yes	No	Yes	No	Both
TCGA-CJ-4904-01	GAB1	Other Category	0.990943	0.3385	0.713427	No	No	No	Yes	No	Yes
TCGA-CJ-4905-01	FLT3	Cancer Gene Census	0.945688	0.3421	0.667503	Yes	Yes	No	No	No	No
TCGA-CJ-4907-01	MTOR	KEGG Cancer Pathway	0.995715	0.431	0.866734	Yes	Yes	Yes	Yes	Both	Both
TCGA-CJ-4908-01	FGFR3	Cancer Gene Census	1.00126	0.5056	0.934399	Yes	No	No	No	NA	No
TCGA-CJ-4913-01	FOXO1	KEGG Cancer Pathway	0.985166	0.419	0.844569	No	No	Yes	No	NA	No
TCGA-CJ-4913-01	PLAU	Other Category	1.01504	0.3039	0.667464	No	No	Yes	No	NA	No
TCGA-CJ-4918-01	VHL	Cancer Gene Census	1.03777	0.3253	0.738676	Yes	Yes	Yes	Yes	Both	Both
TCGA-CJ-4920-01	ABL1	Cancer Gene Census	1.02151	0.4828	0.926808	Yes	No	Yes	No	No	No
TCGA-CJ-4920-01	HSP90AA1	KEGG Cancer Pathway	0.82755	0.4379	0.732517	Yes	No	Yes	No	No	No
TCGA-CJ-4920-01	VHL	Cancer Gene Census	1.00759	0.3253	0.705025	Yes	Yes	Yes	Yes	Both	Both
TCGA-CJ-4920-01	RAD51	KEGG Cancer Pathway	0.957671	0.343	0.684082	Yes	No	No	No	No	No
TCGA-CJ-4920-01	NOTCH2	Cancer Gene Census	0.975225	0.2689	0.530493	Yes	Yes	No	Yes	No	Both
TCGA-CJ-4923-01	BIRC3	Cancer Gene Census	0.928667	0.3125	0.5753	No	No	No	Yes	NA	Yes
TCGA-CJ-5675-01	LEF1	KEGG Cancer Pathway	1.07029	0.3255	0.772384	No	Yes	No	No	NA	No
TCGA-CJ-5675-01	ADCY8	Other Category	1.02313	0.3297	0.731474	Yes	Yes	No	Yes	Yes	Both
TCGA-CJ-5675-01	VHL	Cancer Gene Census	0.973591	0.3253	0.664273	Yes	Yes	Yes	Yes	Both	Both
TCGA-CJ-5675-01	NR4A1	Other Category	0.960333	0.328	0.653842	No	Yes	No	No	NA	No
TCGA-CJ-5677-01	TP53	Cancer Gene Census	1.01586	1	0.99956	Yes	Yes	Yes	Yes	No	Both
TCGA-CJ-5677-01	VHL	Cancer Gene Census	0.984304	0.3253	0.67742	Yes	Yes	Yes	Yes	Both	Both
TCGA-CJ-5679-01	MTOR	KEGG Cancer Pathway	0.994386	0.431	0.865879	Yes	Yes	Yes	Yes	Both	Both
TCGA-CJ-5679-01	EGF	KEGG Cancer Pathway	0.801517	0.4537	0.73541	No	No	Yes	No	NA	No
TCGA-CJ-5679-01	VHL	Cancer Gene Census	0.995569	0.3253	0.690945	Yes	Yes	Yes	Yes	Both	Both
TCGA-CJ-5679-01	TPR	Cancer Gene Census	0.935922	0.31	0.578982	Yes	No	Yes	No	NA	No
TCGA-CJ-5679-01	SPRY2	Other Category	0.955037	0.2876	0.549513	No	No	Yes	No	No	No
TCGA-CJ-5680-01	SHC1	Other Category	0.79413	0.446	0.71166	No	No	No	Yes	NA	Yes
TCGA-CJ-5683-01	MAX	Cancer Gene Census	0.990387	0.3405	0.716911	Yes	No	No	No	NA	No
TCGA-CJ-5686-01	RHEB	Other Category	0.974237	0.294	0.591463	Yes	No	No	Yes	NA	Both
TCGA-CJ-5686-01	WNT8A	KEGG Cancer Pathway	0.94998	0.2916	0.552549	Yes	No	No	No	NA	No
TCGA-CJ-6027-01	MTOR	KEGG Cancer Pathway	0.995405	0.431	0.866535	Yes	Yes	Yes	Yes	Both	Both
TCGA-CJ-6027-01	VHL	Cancer Gene Census	0.995569	0.3253	0.690945	Yes	Yes	Yes	Yes	Both	Both
TCGA-CJ-6030-01	EP300	Cancer Gene Census	0.967161	0.6339	0.977289	Yes	No	Yes	No	Both	No
TCGA-CJ-6030-01	VHL	Cancer Gene Census	0.993953	0.3253	0.689025	Yes	Yes	Yes	Yes	Both	Both
TCGA-CJ-6030-01	FZD1	KEGG Cancer Pathway	0.978292	0.2996	0.610422	Yes	No	No	No	No	No
TCGA-CJ-6030-01	RXRB	KEGG Cancer Pathway	0.990573	0.2659	0.54417	Yes	Yes	No	No	No	No
TCGA-CJ-6030-01	NOTCH4	Other Category	0.990442	0.2589	0.526413	Yes	No	No	No	No	No
TCGA-CJ-6031-01	MAPK3	KEGG Cancer Pathway	0.97037	0.5645	0.956026	Yes	No	No	No	NA	No
TCGA-CJ-6031-01	FGFR1	Cancer Gene Census	0.97037	0.4784	0.901146	Yes	No	No	Yes	No	Both
TCGA-CJ-6031-01	FGFR2	Cancer Gene Census	0.876349	0.4407	0.786995	Yes	No	Yes	No	NA	No
TCGA-CJ-6031-01	VHL	Cancer Gene Census	1.01637	0.3253	0.715075	Yes	Yes	Yes	Yes	Both	Both
TCGA-CJ-6031-01	FZD3	KEGG Cancer Pathway	0.971192	0.3196	0.648288	Yes	No	No	No	NA	No
TCGA-CJ-6031-01	PLCB3	Other Category	0.945991	0.3008	0.569958	Yes	No	No	No	NA	No
TCGA-CJ-6032-01	VHL	Cancer Gene Census	0.99943	0.3253	0.695509	Yes	Yes	Yes	Yes	Both	Both
TCGA-CJ-6032-01	RXRB	KEGG Cancer Pathway	0.983606	0.2659	0.53455	Yes	Yes	No	No	No	No
TCGA-CJ-6032-01	PSMA6	Other Category	1.01682	0.2372	0.50832	No	Yes	No	No	NA	No
TCGA-CJ-6033-01	PIK3CA	Cancer Gene Census	0.991777	0.6235	0.977985	Yes	Yes	Yes	Yes	No	Both
TCGA-CJ-6033-01	HIF1A	KEGG Cancer Pathway	0.983032	0.4357	0.86405	No	No	No	Yes	No	Yes
TCGA-CW-5580-01	GATA2	Cancer Gene Census	1.02167	0.3668	0.797143	Yes	Yes	No	Yes	No	Both
TCGA-CW-5580-01	VHL	Cancer Gene Census	0.978901	0.3253	0.670823	Yes	Yes	Yes	Yes	Both	Both
TCGA-CW-5580-01	MTOR	KEGG Cancer Pathway	0.723158	0.431	0.588459	Yes	Yes	Yes	Yes	Both	Both
TCGA-CW-5581-01	PLCG2	KEGG Cancer Pathway	0.831027	0.4078	0.673245	Yes	No	No	No	NA	No
TCGA-CW-5583-01	PTGS2	KEGG Cancer Pathway	0.987486	0.4532	0.886024	Yes	Yes	No	Yes	No	Both
TCGA-CW-5583-01	BMPR2	Other Category	0.971194	0.3055	0.615193	Yes	No	Yes	No	No	No
TCGA-CW-5585-01	PDGFRA	Cancer Gene Census	0.937698	0.5179	0.918878	Yes	No	Yes	Yes	No	Both
TCGA-CW-5588-01	ITPR1	Other Category	1.06974	0.3306	0.780793	Yes	No	No	No	NA	No
TCGA-CW-5588-01	VHL	Cancer Gene Census	0.968983	0.3253	0.658538	Yes	Yes	Yes	Yes	Both	Both
TCGA-CW-5591-01	TCF7L2	Cancer Gene Census	0.981569	0.3092	0.637426	No	No	No	Yes	No	Yes
TCGA-CW-6087-01	MET	Cancer Gene Census	0.984115	0.3927	0.805539	Yes	No	Yes	Yes	Both	Both
TCGA-CW-6087-01	ADCY8	Other Category	0.948537	0.3297	0.642808	Yes	Yes	No	Yes	Yes	Both
TCGA-CW-6090-01	FGFR1	Cancer Gene Census	0.979622	0.4784	0.905633	Yes	No	No	Yes	No	Both
TCGA-CZ-4853-01	BRCA1	Cancer Gene Census	0.947301	0.5705	0.953094	Yes	Yes	Yes	No	No	No
TCGA-CZ-4853-01	VHL	Cancer Gene Census	0.97539	0.3253	0.6665	Yes	Yes	Yes	Yes	Both	Both
TCGA-CZ-4853-01	NF1	Cancer Gene Census	0.939074	0.3204	0.608521	Yes	No	No	No	No	No
TCGA-CZ-4853-01	FZD5	KEGG Cancer Pathway	0.992412	0.291	0.608437	Yes	No	No	No	NA	No
TCGA-CZ-4854-01	ITPR3	Other Category	1.02343	0.3024	0.674417	Yes	No	Yes	No	No	No
TCGA-CZ-4857-01	PIK3R1	Cancer Gene Census	0.968994	0.5807	0.962134	Yes	No	No	Yes	No	Both
TCGA-CZ-4857-01	MTOR	KEGG Cancer Pathway	1.01968	0.431	0.881381	Yes	Yes	Yes	Yes	Both	Both
TCGA-CZ-4857-01	PTGS2	KEGG Cancer Pathway	0.907094	0.4532	0.832572	Yes	Yes	No	Yes	No	Both
TCGA-CZ-4857-01	NOTCH2	Cancer Gene Census	0.97294	0.2689	0.527329	Yes	Yes	No	Yes	No	Both
TCGA-CZ-4858-01	VHL	Cancer Gene Census	0.958671	0.3253	0.645536	Yes	Yes	Yes	Yes	Both	Both
TCGA-CZ-4859-01	EP300	Cancer Gene Census	0.920753	0.6339	0.970802	Yes	No	Yes	No	Both	No
TCGA-CZ-4859-01	PIAS1	Other Category	0.950659	0.2854	0.537967	Yes	No	Yes	No	No	No
TCGA-CZ-4859-01	VTN	Other Category	0.984769	0.2654	0.534903	Yes	No	No	No	No	No
TCGA-CZ-4861-01	ATM	Cancer Gene Census	1.02716	0.4452	0.899393	Yes	Yes	No	Yes	No	Both
TCGA-CZ-4861-01	VHL	Cancer Gene Census	0.984304	0.3253	0.67742	Yes	Yes	Yes	Yes	Both	Both
TCGA-CZ-4865-01	TP53	Cancer Gene Census	1.00689	1	0.999538	Yes	Yes	Yes	Yes	No	Both
TCGA-CZ-4865-01	CDK2	KEGG Cancer Pathway	0.968507	0.4392	0.858629	Yes	No	No	No	NA	No
TCGA-CZ-4866-01	MTOR	KEGG Cancer Pathway	0.994715	0.431	0.866091	Yes	Yes	Yes	Yes	Both	Both
TCGA-CZ-5451-01	ATM	Cancer Gene Census	0.976909	0.4452	0.871156	Yes	Yes	No	Yes	No	Both
TCGA-CZ-5453-01	CAMK2G	Other Category	0.965444	0.28	0.544834	No	Yes	Yes	No	NA	No
TCGA-CZ-5456-01	NOTCH2	Cancer Gene Census	0.979006	0.2689	0.535724	Yes	Yes	No	Yes	No	Both
TCGA-CZ-5456-01	ARNT2	KEGG Cancer Pathway	1.05334	0.2152	0.503539	No	Yes	No	No	No	No
TCGA-CZ-5457-01	KDR	Cancer Gene Census	0.983379	0.4104	0.831441	No	No	Yes	Yes	Both	Both
TCGA-CZ-5457-01	CHEK2	Cancer Gene Census	1.01975	0.3688	0.79868	No	No	Yes	Yes	No	Both
TCGA-CZ-5457-01	THBS1	Other Category	0.986716	0.3752	0.778867	Yes	No	Yes	No	NA	No
TCGA-CZ-5457-01	VHL	Cancer Gene Census	1.00552	0.3253	0.702633	Yes	Yes	Yes	Yes	Both	Both
TCGA-CZ-5458-01	VHL	Cancer Gene Census	0.982315	0.3253	0.674999	Yes	Yes	Yes	Yes	Both	Both
TCGA-CZ-5459-01	THBS1	Other Category	0.962704	0.3752	0.755031	Yes	No	Yes	No	NA	No
TCGA-CZ-5459-01	KITLG	KEGG Cancer Pathway	0.850841	0.3811	0.637259	No	No	Yes	No	NA	No
TCGA-CZ-5462-01	PIK3CG	KEGG Cancer Pathway	0.829663	0.4616	0.778755	No	No	Yes	Yes	No	Both
TCGA-CZ-5462-01	BIRC2	KEGG Cancer Pathway	0.936106	0.2907	0.531156	No	No	No	Yes	NA	Yes
TCGA-CZ-5463-01	TP53	Cancer Gene Census	0.978448	1	0.999458	Yes	Yes	Yes	Yes	No	Both
TCGA-CZ-5465-01	CCND2	Cancer Gene Census	0.966216	0.3719	0.75247	No	No	Yes	No	NA	No
TCGA-CZ-5466-01	PDGFRA	Cancer Gene Census	0.9798	0.5179	0.934697	Yes	No	Yes	Yes	No	Both
TCGA-CZ-5466-01	PRKACB	Other Category	0.960016	0.419	0.825324	No	Yes	Yes	No	NA	No
TCGA-CZ-5466-01	HSPA8	Other Category	0.998549	0.2631	0.548151	No	No	Yes	No	NA	No
TCGA-CZ-5467-01	PDGFRA	Cancer Gene Census	0.988735	0.5179	0.937663	Yes	No	Yes	Yes	No	Both
TCGA-CZ-5469-01	VHL	Cancer Gene Census	0.975102	0.3253	0.666144	Yes	Yes	Yes	Yes	Both	Both
TCGA-CZ-5469-01	WNT2	KEGG Cancer Pathway	0.930943	0.2977	0.541592	No	Yes	No	No	No	No
TCGA-CZ-5470-01	JUN	Cancer Gene Census	0.915423	0.5588	0.93798	Yes	Yes	No	No	No	No
TCGA-CZ-5470-01	ITGB1	KEGG Cancer Pathway	0.920551	0.4284	0.806652	No	Yes	Yes	No	No	No
TCGA-CZ-5470-01	VHL	Cancer Gene Census	0.976971	0.3253	0.66845	Yes	Yes	Yes	Yes	Both	Both
TCGA-CZ-5982-01	BRCA2	Cancer Gene Census	0.993289	0.4978	0.92644	Yes	No	Yes	No	No	No
TCGA-CZ-5984-01	PRKCB	KEGG Cancer Pathway	0.989827	0.4528	0.886927	Yes	No	No	No	No	No
TCGA-CZ-5986-01	TLN1	Other Category	0.99482	0.2681	0.555508	Yes	No	Yes	No	No	No
TCGA-CZ-5987-01	MTOR	KEGG Cancer Pathway	0.976703	0.431	0.85405	Yes	Yes	Yes	Yes	Both	Both
TCGA-CZ-5987-01	VHL	Cancer Gene Census	0.987946	0.3253	0.681827	Yes	Yes	Yes	Yes	Both	Both
TCGA-CZ-5988-01	ATF2	Other Category	0.956223	0.3302	0.653699	Yes	No	No	No	No	No
TCGA-DV-5569-01	CAMK2D	Other Category	0.996122	0.283	0.594018	Yes	No	No	No	NA	No
TCGA-EU-5904-01	VHL	Cancer Gene Census	0.969019	0.3253	0.658583	Yes	Yes	Yes	Yes	Both	Both
TCGA-EU-5904-01	NRP1	Other Category	0.977997	0.2792	0.560086	Yes	No	No	No	NA	No
TCGA-EU-5905-01	PRKAR1A	Cancer Gene Census	1.03642	0.3444	0.772841	Yes	No	Yes	No	NA	No
TCGA-EU-5906-01	VHL	Cancer Gene Census	0.977888	0.3253	0.669578	Yes	Yes	Yes	Yes	Both	Both
TCGA-EU-5906-01	PSMC1	Other Category	1.05035	0.2778	0.65238	Yes	No	No	No	NA	No
TCGA-EU-5906-01	SIN3A	Other Category	0.950608	0.2876	0.543412	Yes	No	No	No	No	No
TCGA-EU-5907-01	MET	Cancer Gene Census	0.916736	0.3927	0.740162	Yes	No	Yes	Yes	Both	Both
TCGA-EU-5907-01	NGFR	Other Category	0.95914	0.3061	0.600671	No	No	Yes	No	NA	No
